# Supplementary material for: Coil spring-powered pump with inertial microfluidic chip for size-based isolation and enrichment of biological cells
Source: Royal Society of Chemistry journal article supplement (doi:10.1039/d2an01380k), 2022-01-01
Supplement: d2an01380k1.pdf [file d2an01380k1.pdf]

## Supplementary information

(a)

| Particle diameter ( $\mu\text{m}$ ) | Particle size uniformity (%) | Volume fraction (%) | Particle concentration ( $\times 10^6/\text{mL}$ ) |
|-------------------------------------|------------------------------|---------------------|----------------------------------------------------|
| 2                                   | 5                            | 0.005               | 114                                                |
| 7                                   | 14                           | 0.2                 | 10.7                                               |
| 10                                  | 14                           | 0.2                 | 3.64                                               |
| 15                                  | 18                           | 0.2                 | 1.08                                               |

(b)

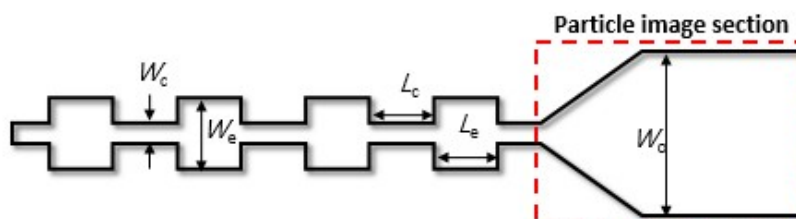

|             | Height ( $\mu\text{m}$ ) | $W_c$ ( $\mu\text{m}$ ) | $W_e$ ( $\mu\text{m}$ ) | $L_c$ ( $\mu\text{m}$ ) | $L_e$ ( $\mu\text{m}$ ) | $W_o$ ( $\mu\text{m}$ ) | Orifice (n) |
|-------------|--------------------------|-------------------------|-------------------------|-------------------------|-------------------------|-------------------------|-------------|
| Plasma-chip | 60                       | 150                     | 750                     | 375                     | 750                     | 800                     | 50          |
| CTC-chip    | 60                       | 60                      | 300                     | 150                     | 300                     | 800                     | 80          |
| WBC-chip    | 30                       | 30                      | 150                     | 75                      | 150                     | 800                     | 100         |

S1. Specifications of (a) particle suspensions and (b) channel dimensions of microfluidic chips.

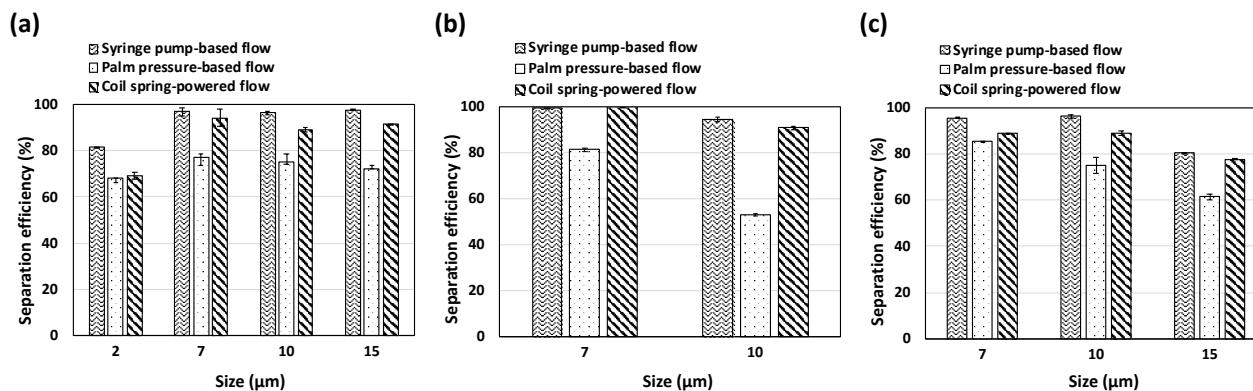

S2. Separation efficiencies of microbeads in (a) plasma-chip, (b) WBC-chip, and (c) CTC-chip. Data are represented using average  $\pm$  standard deviation ( $n = 3$ ).
